# Supplementary material
Source: PubMed Central journal article supplement (PMC3369684)

## Supplemental figure 1

Candidate target genes predicted *in silico*: qRT PCR validation using an independent sample set as described in materials and methods, but including only 11 AML samples: (A) HOXB6 (HOXB6\_Fwd: AAGTGCTCCACTCCGGTCTA, HOXB6\_probe: 6FAM-GACATACACACGTTACCAGACGCTG-TAMRA, HOXB6\_Rev: GCTGAGCAGTTTGTCTCCT), (B) OSBPL5 (OSBPL5\_Fwd CACAGCCAAGTCCAGGTTTT, OSBPL5\_probe 6FAM-AGCCGAGGATTACACCCTTACCAT-TAMRA, OSBPL5\_R CGAAGAAGGGCTTGAGTTTG), (C) WT1 (WT1.2\_Fwd: TACAGCACGGTCACCTTCG, WT1.2\_probe: 6FAM-CTCATTCAAGCATGAGGATCCCAT-TAMRA, WT1.2\_rev: GCGTCCTCAGCAGCAAAG), (D) BAHCC1 (BAHCC1.2\_Fwd ACCGGCAGAGGATCTACTCA, BAHCC1.2\_probe 6FAM-AGAAGTCTCGATGTCTGTACCCGG-TAMRA, BAHCC1.2\_rev TCCAGGTCCTCATCTTCGTC), (E) WDR49: several splice variants have been described, and shown is the data from primer/probe set 3 quantifying ensemble variants 001, 002, 003, 201, 202 (WDR49.3\_Fwd GGCATTCATGCTTTTGATT, WDR49.3\_probe 6FAM-GCCAGTGTAAATAGCCGTCCAATTC-TAMRA, WDR49.3\_rev GATGGACAGCTGGTGTGAA). Primer/probe set 2 specific for variants 001, 003, 004, 202 and both lengths of exon 6 (WDR49.2\_fwd GAGACTCGGCTTTTGGACTGG, WDR49.2\_probe.2 6FAM-ctaaatgtgggcaagatggagct-TAMRA, WDR49.2\_rev GAAGTTTTGGGGTCGAAACA) shows comparable results (data not shown). (F) SMYD3 (SMYD3\_Fwd CCATGGAGCCATACAGGATT, SMYD3\_probe 6FAM-GTGATGAAAGTTGGCAAAGTGCAG-TAMRA, SMYD3\_Rev GCTGTGTTCTCTGCCATGTG).

## Supplemental figure 2:

Comparison of absolute expression of cyclin-A1 with WT1 based on qRT PCR. Shown are the copy numbers per copies of GAPDH quantified in the same unselected sample set. Horizontal lines represent medians, \*  $p < 0.001$  (Wilcoxon signed rank test).

### Supplemental figure 3:

Testing for HLA class I-restriction of immunogenic peptides in T-cell lines by IFN $\gamma$  ICS: (A) Epitopes were first screened for HLA A\*0201-restriction by testing the respective T-cell line for IFN $\gamma$  production after stimulation by K562, K562 transfected with A\*0201 and autoLCLs pulsed with the respective 15-mer. Two representative examples are shown: epitope 218-226 (15-mer 217-231), which is restricted to A\*0201 and epitope 120-131 (15-mer 117-131), which is not restricted to A\*0201. No unspecific IFN $\gamma$  production was observed after stimulation with unpulsed LCLs (not shown). Plots are gated on CD8 $^+$  cells, (B) in case of a HLA restriction other than to A\*0201, the HLA-restrictions were determined using ICS for IFN $\gamma$  production with 721.221 stimulator cells transfected with a single HLA allele or allogeneic LCLs sharing one or two HLA class I allele with the respective donor. For a representative example, IFN $\gamma$  ICS plots gated on CD8 $^+$  are shown for clone 2196.F10 specific for epitope 120-131. All stimulator cells were pulsed with the respective peptide. Untransfected 721.221s were used as negative control, autologous LCL were used as positive control. Allogeneic LBF LCL shared with donor 2196 only the C\*0602 class I allele, LCL PF97387 shared alleles B\*4403 and C\*1601, and LCL WJR076 shared alleles A\*0201 and B\*5701. With only the latter being able to stimulate clone 2196.F10, epitope 120-131 is restricted to B\*5701.

Supplemental figure 1:

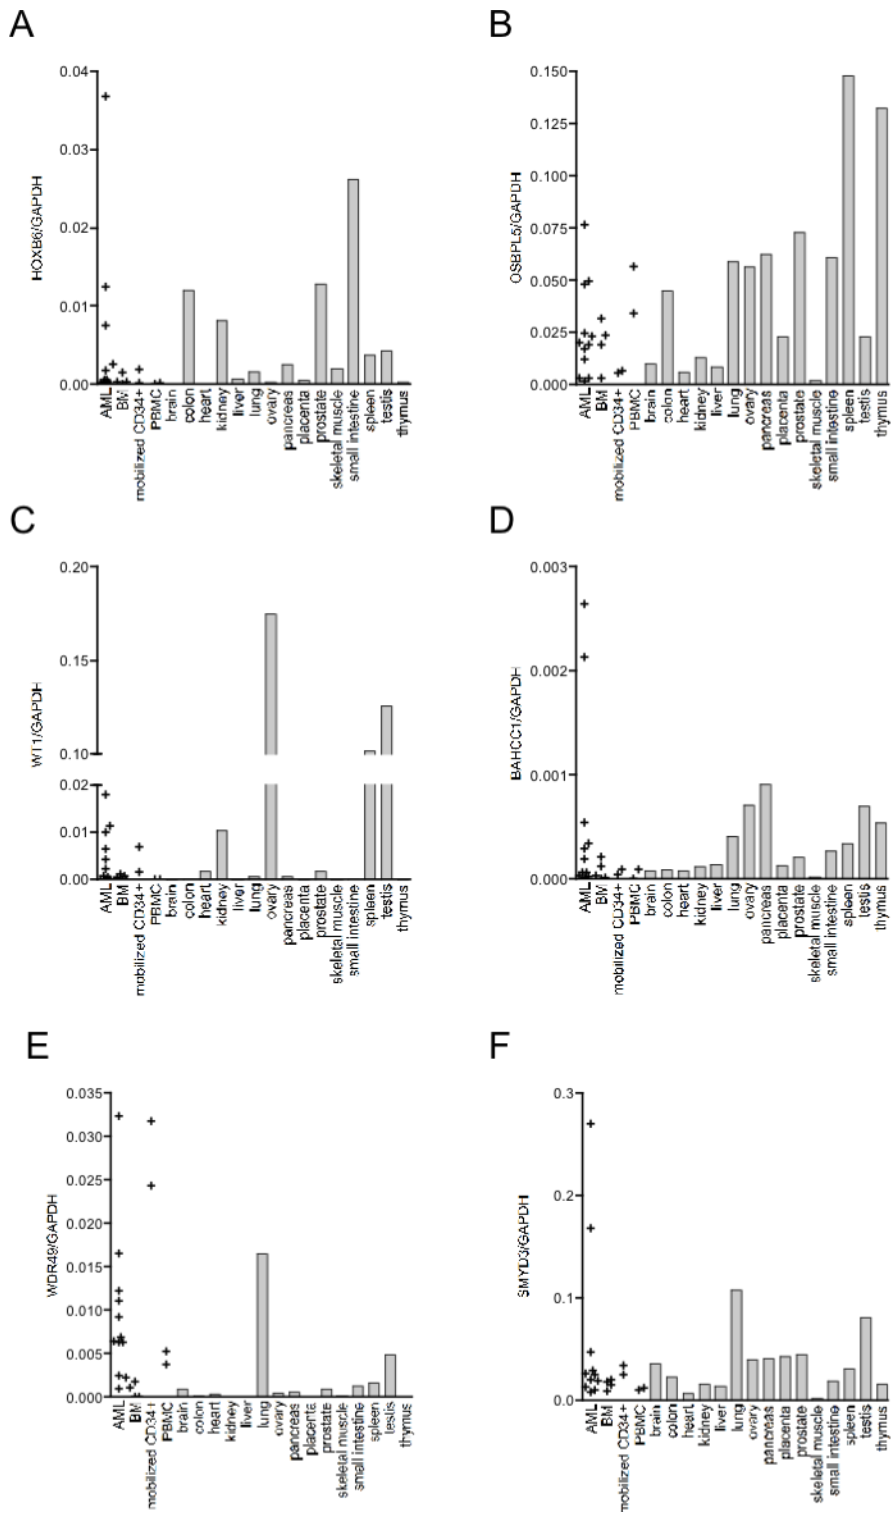

Supplemental figure 2:

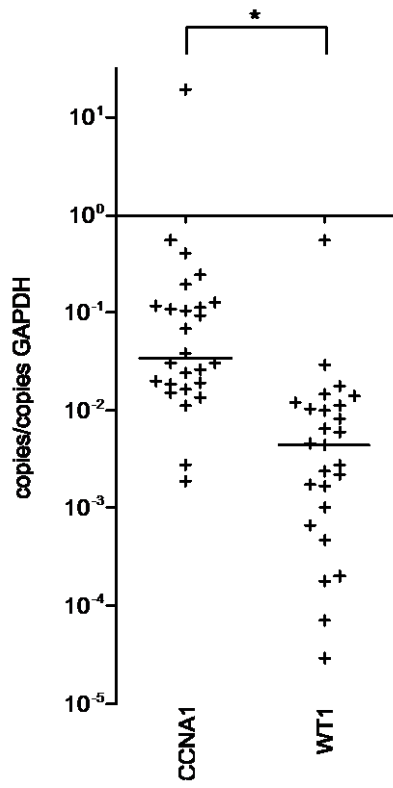

Supplemental figure 3:

**A**

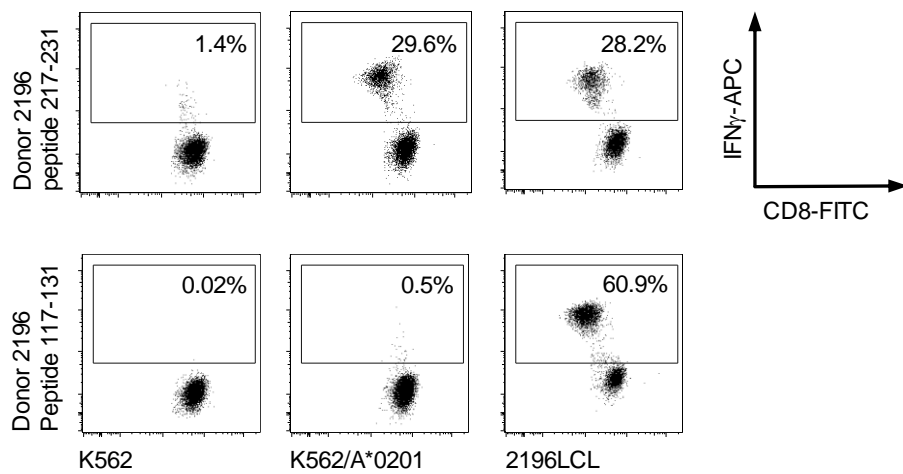

**B**

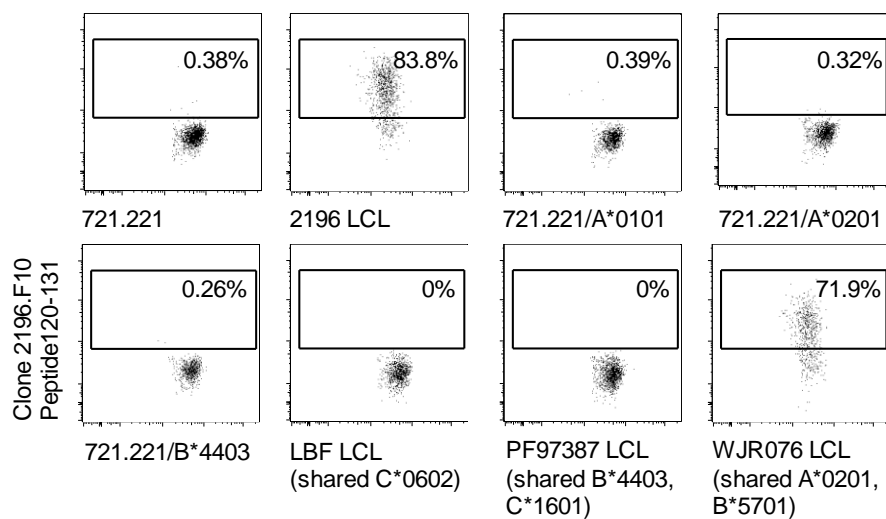

Supplement: supp_blood-2011-07-365890_blood-2011-07-365890-1.pdf [file supp_blood-2011-07-365890_blood-2011-07-365890-1.pdf]
